# Supplementary material
Source: PubMed Central journal article supplement (PMC5648012)
Supplement: NIHMS882631-supplement-supplemental_file.pdf [file NIHMS882631-supplement-supplemental_file.pdf]

# **Fluorescent Protein-Based Turn-On Probe Through A General Protection-Deprotection Design Strategy**

Xin Shang,<sup>1</sup> Nanxi Wang, Ronald Cerny, Wei Niu,<sup>2</sup> Jiantao Guo<sup>1\*</sup>

1. Department of Chemistry, University of Nebraska-Lincoln, Lincoln, Nebraska, 68588, United States.

2. Department of Chemical & Biomolecular Engineering, University of Nebraska-Lincoln, Lincoln, Nebraska, 68588, United States.

## Supporting Information

|                                      |      |
|--------------------------------------|------|
| I. Synthetic procedures.....         | S-3  |
| II. Primer list.....                 | S-4  |
| III. Supplemental figures and tables |      |
| 1. Figure S1.....                    | S-5  |
| 2. Figure S2.....                    | S-6  |
| 3. Figure S3.....                    | S-7  |
| 4. Figure S4.....                    | S-8  |
| 5. Figure S5.....                    | S-9  |
| 6. Figure S6.....                    | S-10 |
| 7. Figure S7.....                    | S-11 |
| 8. Figure S8.....                    | S-12 |
| 9. Figure S9.....                    | S-13 |
| 10. Figure S10.....                  | S-14 |
| 11. Figure S11.....                  | S-15 |
| 12. Figure S12.....                  | S-16 |
| 13. Figure S13.....                  | S-17 |
| 14. Table S1.....                    | S-18 |
| IV. References.....                  | S-23 |

## I. Synthetic procedures

### ***N*-(9-Fluorenylmethoxycarbonyl)-*p*-vinylxy-L-phenylalanine methyl ester**

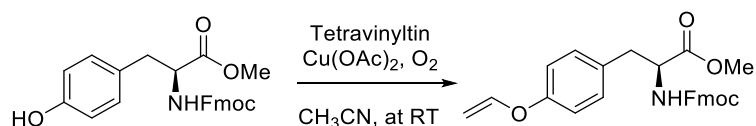

Anhydrous  $\text{Cu}(\text{OAc})_2$  (220 mg, 1.2 mmol) was added to a solution of *N*-(9-Fluorenylmethoxycarbonyl)-L-tyrosine methyl ester<sup>1</sup> (417 mg, 1.0 mmol) in 5 mL of acetonitrile. The mixture was bubbled with oxygen for half an hour and then tetravinyltin (220  $\mu\text{L}$ , 1.2 mmol) was added with stirring. After being stirred at room temperature for 22 hours, the reaction mixture was poured into 30 mL of 25% aqueous solution of ammonium acetate. The resulting solution was extracted with ethyl acetate (30 mL  $\times$  3). The combined organic layers were washed with brine, dried over sodium sulfate, and concentrated under vacuum. The residue was further purified by silica gel flash chromatography (hexane/ethyl acetate, from 20/1 to 4/1, v/v). Desired product (359 mg) was obtained as white solid. The yield was 81%. <sup>1</sup>H-NMR (400 MHz,  $\text{CDCl}_3$ ; Figure S8)  $\delta$  ppm: 7.77 (d,  $J = 7.5$  Hz, 2H), 7.57 (t,  $J = 6.3$  Hz, 2H), 7.45 – 7.36 (m, 2H), 7.32 (tt,  $J = 7.5, 1.4$  Hz, 2H), 7.03 (d,  $J = 8.2$  Hz, 2H), 6.92 (d,  $J = 8.5$  Hz, 2H), 6.60 (dd,  $J = 13.7, 6.0$  Hz, 1H), 5.23 (d,  $J = 8.2$  Hz, 1H), 4.76 (dd,  $J = 13.7, 1.7$  Hz, 1H), 4.64 (m, 1H), 4.50 – 4.45 (m, 1H), 4.43 (m, 1H), 4.36 (m, 1H), 4.21 (t,  $J = 6.9$  Hz, 1H), 3.73 (s, 3H), 3.08 (m, 2H). <sup>13</sup>C-NMR (101 MHz,  $\text{CDCl}_3$ )  $\delta$  ppm: 171.99, 156.09, 155.65, 148.18, 143.97, 143.84, 141.48, 130.65, 127.88, 127.21, 125.21, 125.15, 120.15, 120.13, 117.30, 95.40, 77.48, 77.16, 76.84, 67.04, 54.95, 52.53, 47.33, 37.62. MS (ESI) calcd for  $\text{C}_{27}\text{H}_{25}\text{NO}_5$ ,  $[\text{M} + \text{H}]^+$  444.2, found 443.7.

### ***p*-vinylxy-L-phenylalanine (ViP)**

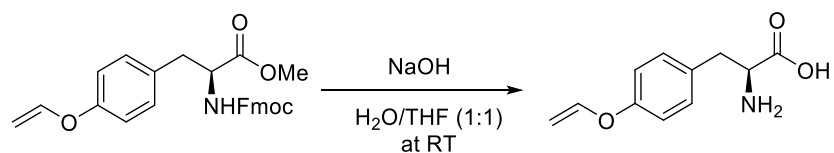

The purified product from the above step was dissolved in 2.25 mL of tetrahydrofuran (THF), followed by dropwise addition of the same volume of 1 N aqueous solution of sodium hydroxide with stirring. After being stirred at room temperature for 24 hours, the mixture was washed with diethyl ether multiple times until no byproduct in the organic layer was detected by TLC. The aqueous layer was diluted and neutralized. The resulting solution was desalted by Amberlite

XAD4 flash chromatography, affording 55 mg yellowish product (yield: 59%). <sup>1</sup>H-NMR (400MHz, D<sub>2</sub>O; Figure S9) δ ppm: 7.31 (d, *J* = 8.6 Hz, 2H), 7.10 (d, *J* = 8.6 Hz, 2H), 6.79 (dd, *J* = 13.7, 6.1 Hz, 1H), 4.82 (dd, *J* = 13.7, 1.9 Hz, 1H), 4.56 (dd, *J* = 6.1, 1.9 Hz, 1H), 3.97 (dd, *J* = 7.8, 5.3 Hz, 1H), 3.25 (dd, *J* = 14.6, 5.3 Hz, 1H), 3.11 (dd, *J* = 14.6, 7.8 Hz, 1H). <sup>13</sup>C-NMR (101 MHz, D<sub>2</sub>O) δ ppm: 182.38, 154.93, 148.64, 133.42, 130.81, 117.19, 94.90, 57.65, 40.08. MS (ESI) calcd for C<sub>11</sub>H<sub>13</sub>NO<sub>3</sub>, [M + H]<sup>+</sup> 208.1, found 208.3

## II Primer list

P1: 5'-GAGGAGAAATTACATATGTCCAAG-3'

P2: 5'- AGTGAGGGTAGTTACCAGGGT-3'

P3: 5'-ACCCTGGTAACTACCCTCACTtatGGTGTCCAGTGCTTCTCTCG-3'

P4: 5'-GAGTCCAAGCTCAGCGGTG-3'

P5: 5'-GTGGCTATTGAAGTTATACTCCA-3'

P6: 5'-TGGAGTATAACTTCAATAGCCACtagGTGTACATCACTGCTGATAAACAG-3'

### III. Supplemental figures

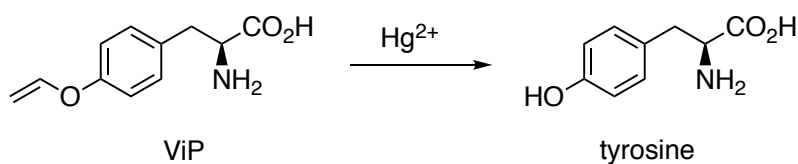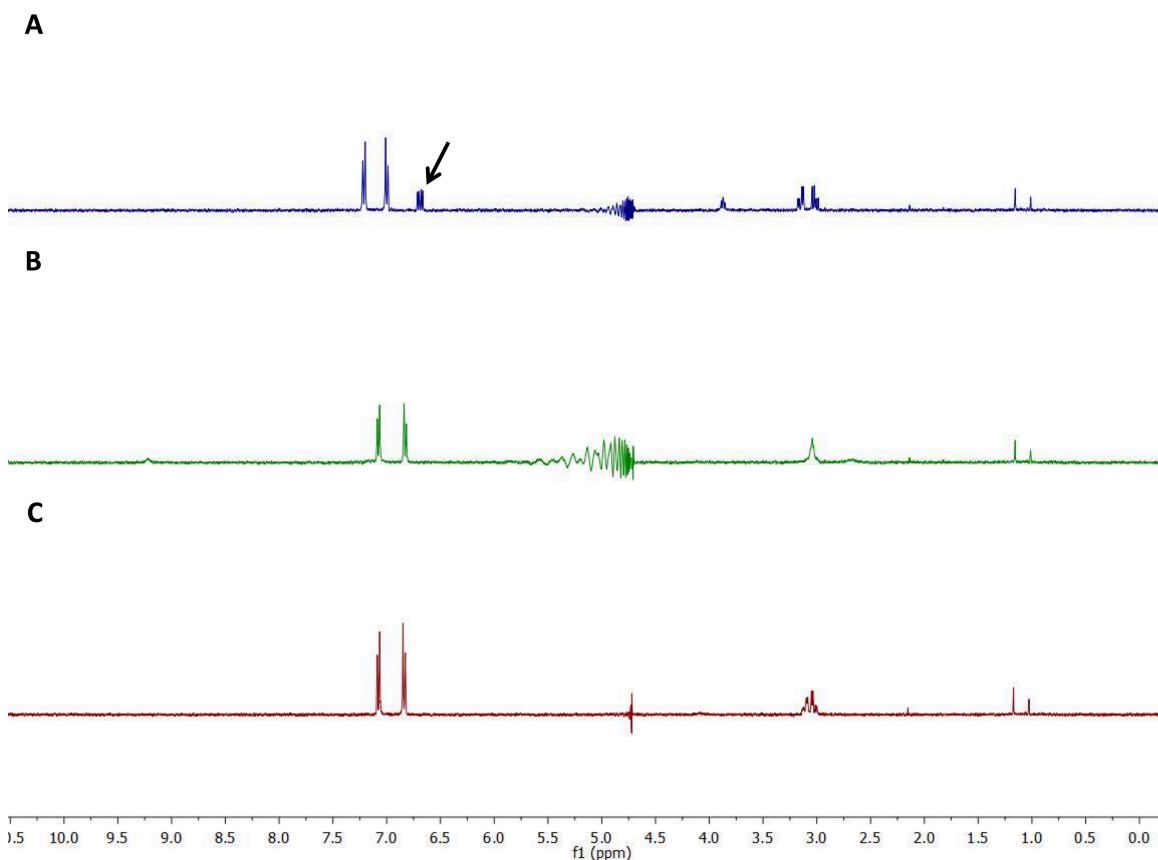

**Figure S1. Water suppression NMR study of the deprotection of ViP with  $\text{Hg}^{2+}$ .** (A) NMR spectrum of ViP (2 mM) in the absence of  $\text{Hg}^{2+}$ . The proton of the vinyloxy group next to the oxygen was observed at  $\delta$  6.8 ppm (arrow). The signal from other two protons of the vinyloxy group were suppressed due to their proximity to the water peak; (B) NMR spectrum of ViP (2 mM) in the presence of 2 mM  $\text{Hg}^{2+}$ . The NMR spectrum was taken immediately after the addition of  $\text{Hg}^{2+}$ ; (C) NMR spectrum of tyrosine (2 mM).

The deprotection product was confirmed to be tyrosine.

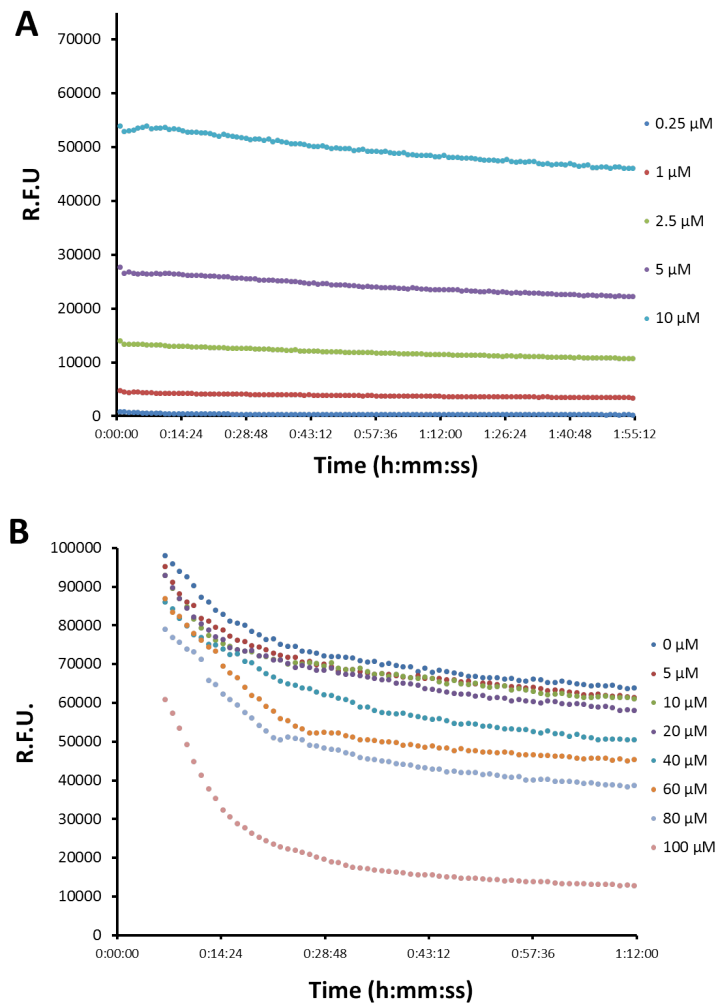

**Figure S2. Time courses of the fluorescence intensity changes of wild-type sfGFP in the presence of Hg<sup>2+</sup>.** (A) Varied concentrations of wild-type sfGFP were incubated with 100 μM Hg<sup>2+</sup>; (B) The wild-type sfGFP (0.25 μM) was incubated with varied concentrations of Hg<sup>2+</sup>. The reduced fluorescence intensity over time is likely due to the bleaching of the FP.

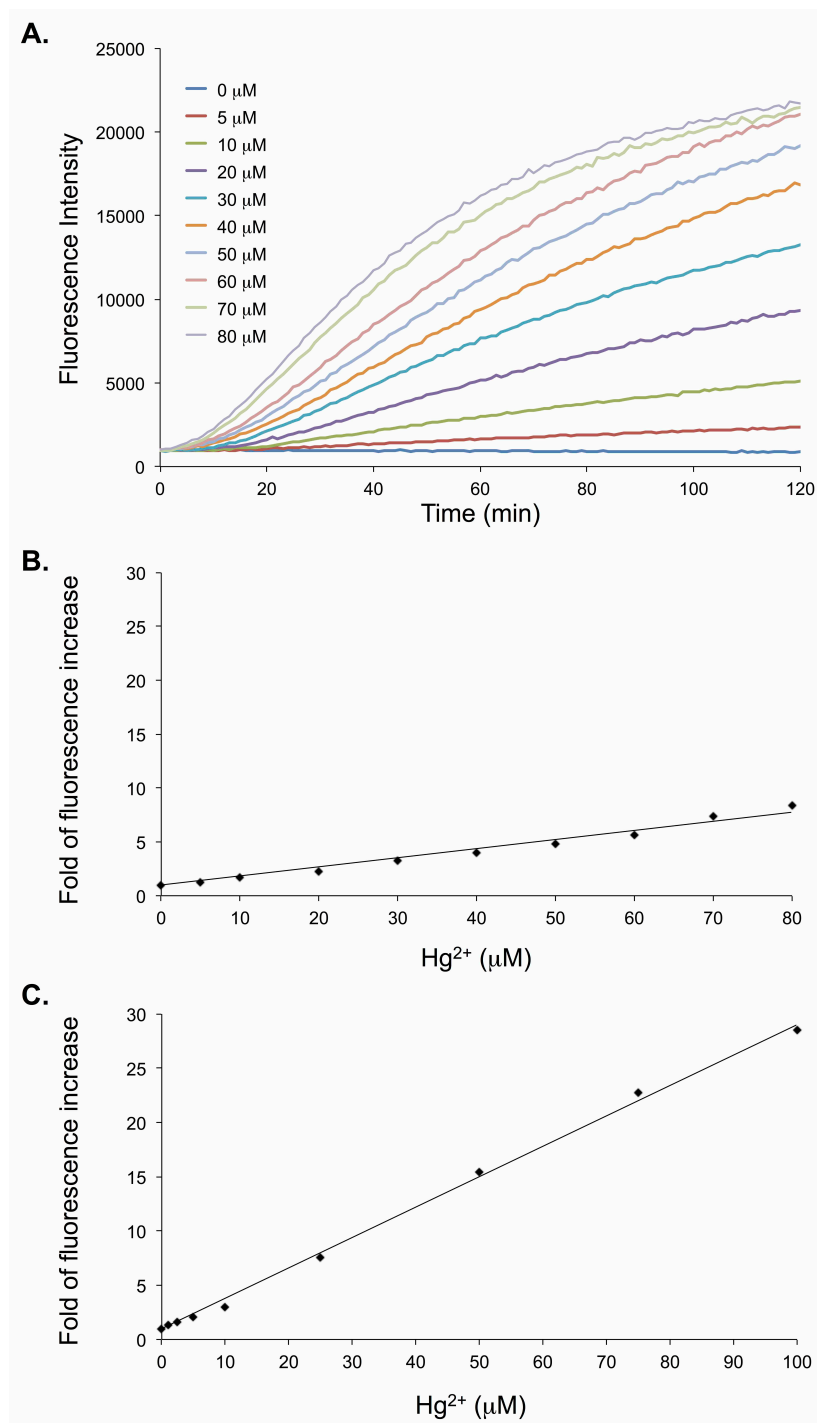

**Figure S3. Hg<sup>2+</sup> Sensing using sfGFP variants.** (A) Time courses of fluorescence intensity change of sfGFP-Tyr66ViP in the presence of varied concentrations of Hg<sup>2+</sup>; (B) Changes in fluorescence of sfGFP-Tyr66ViP after an incubation with different concentrations of Hg<sup>2+</sup> for 30 min; (C) Changes in fluorescence of cpsfGFP-Tyr66ViP after an incubation with different concentrations of Hg<sup>2+</sup> for 30 min.

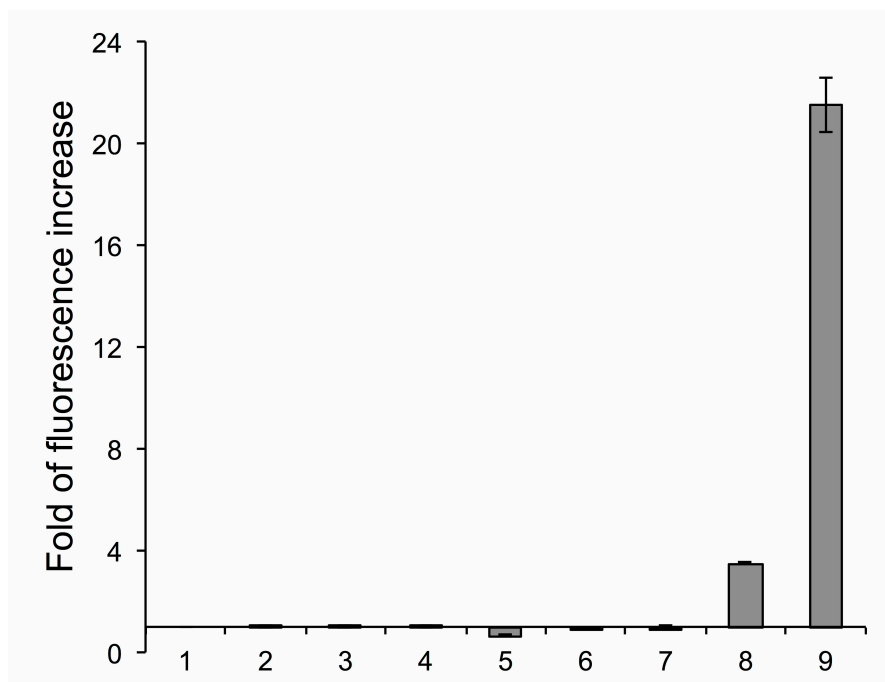

**Figure S4. Fluorescence changes of sfGFP-Tyr66ViP (0.5 μM) in response to different metal ions after 90 minutes of incubation.** 1, blank (no metal ion added); 2, 100 μM Zn<sup>2+</sup>; 3, 100 μM Mg<sup>2+</sup>; 4, 100 μM Mn<sup>2+</sup>; 5, 100 μM Cu<sup>2+</sup>; 6, 100 μM Co<sup>2+</sup>; 7, 100 μM Ca<sup>2+</sup>; 8, 10 μM Hg<sup>2+</sup>; 9, 100 μM Hg<sup>2+</sup>.



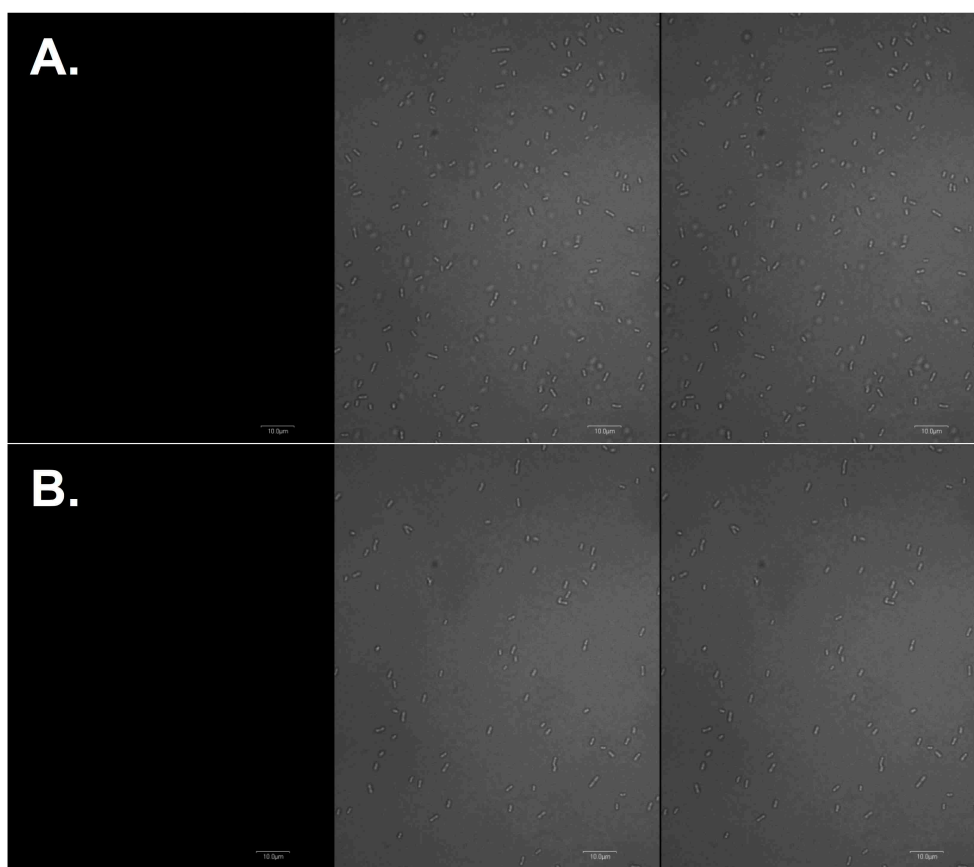

**Figure S5. Fluorescence imaging of live *E. coli* cells expressing sfGFP variants.** (A) *E. coli* cells expressing sfGFP-Tyr66TAG in the absence of ViP, after the addition of Hg<sup>2+</sup>; (B) *E. coli* cells expressing sfGFP-Tyr66TAG in the absence of PrFRS, after the addition of Hg<sup>2+</sup>. For all images, the left panel shows fluorescent images of *E. coli* cells in FITC channel (494 nm excitation and 518 nm emission), the middle panel shows bright-field images of the same *E. coli* cells, and the right panel shows composite images of bright-field and fluorescent images. Scale bars, 10 μm.

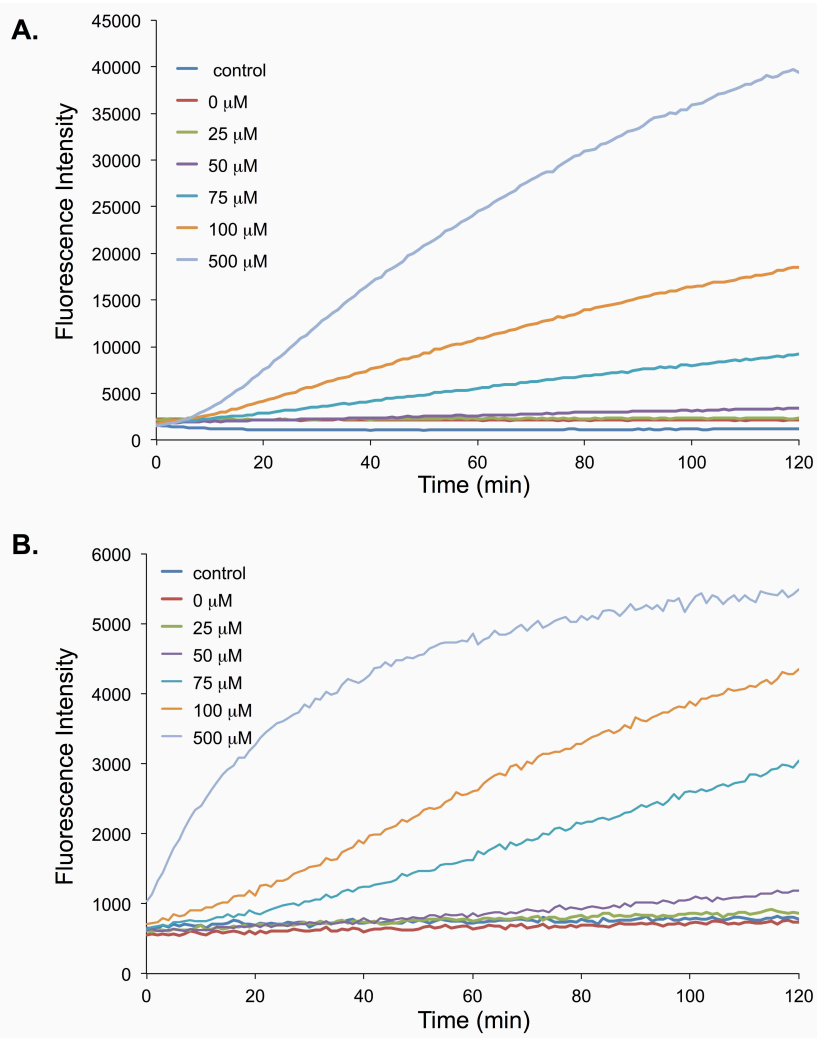

**Figure S6. Time courses of fluorescence intensity change of cells expressing sfGFP-Tyr66ViP or cpsfGFP-Tyr66ViP in the presence of  $Hg^{2+}$ .** (A) sfGFP-Tyr66ViP in the presence of different concentrations of  $Hg^{2+}$  at varying time points; (B) cpsfGFP-Tyr66ViP in the presence of different concentrations of  $Hg^{2+}$  for 5 h.

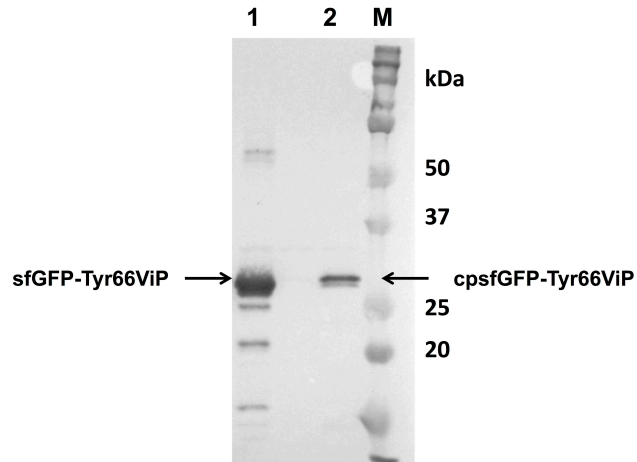

**Figure S7. Protein expression levels of sfGFP-Tyr66ViP and cpsfGFP-Tyr66ViP.** The protein expression level was detected by Western blot using anti-His<sub>6</sub> tag antibody. The same amount of cells was used in this analysis. Lane 1, sfGFP-Tyr66ViP; Lane 2, cpsfGFP-Tyr66ViP; lane M, molecular weight marker.

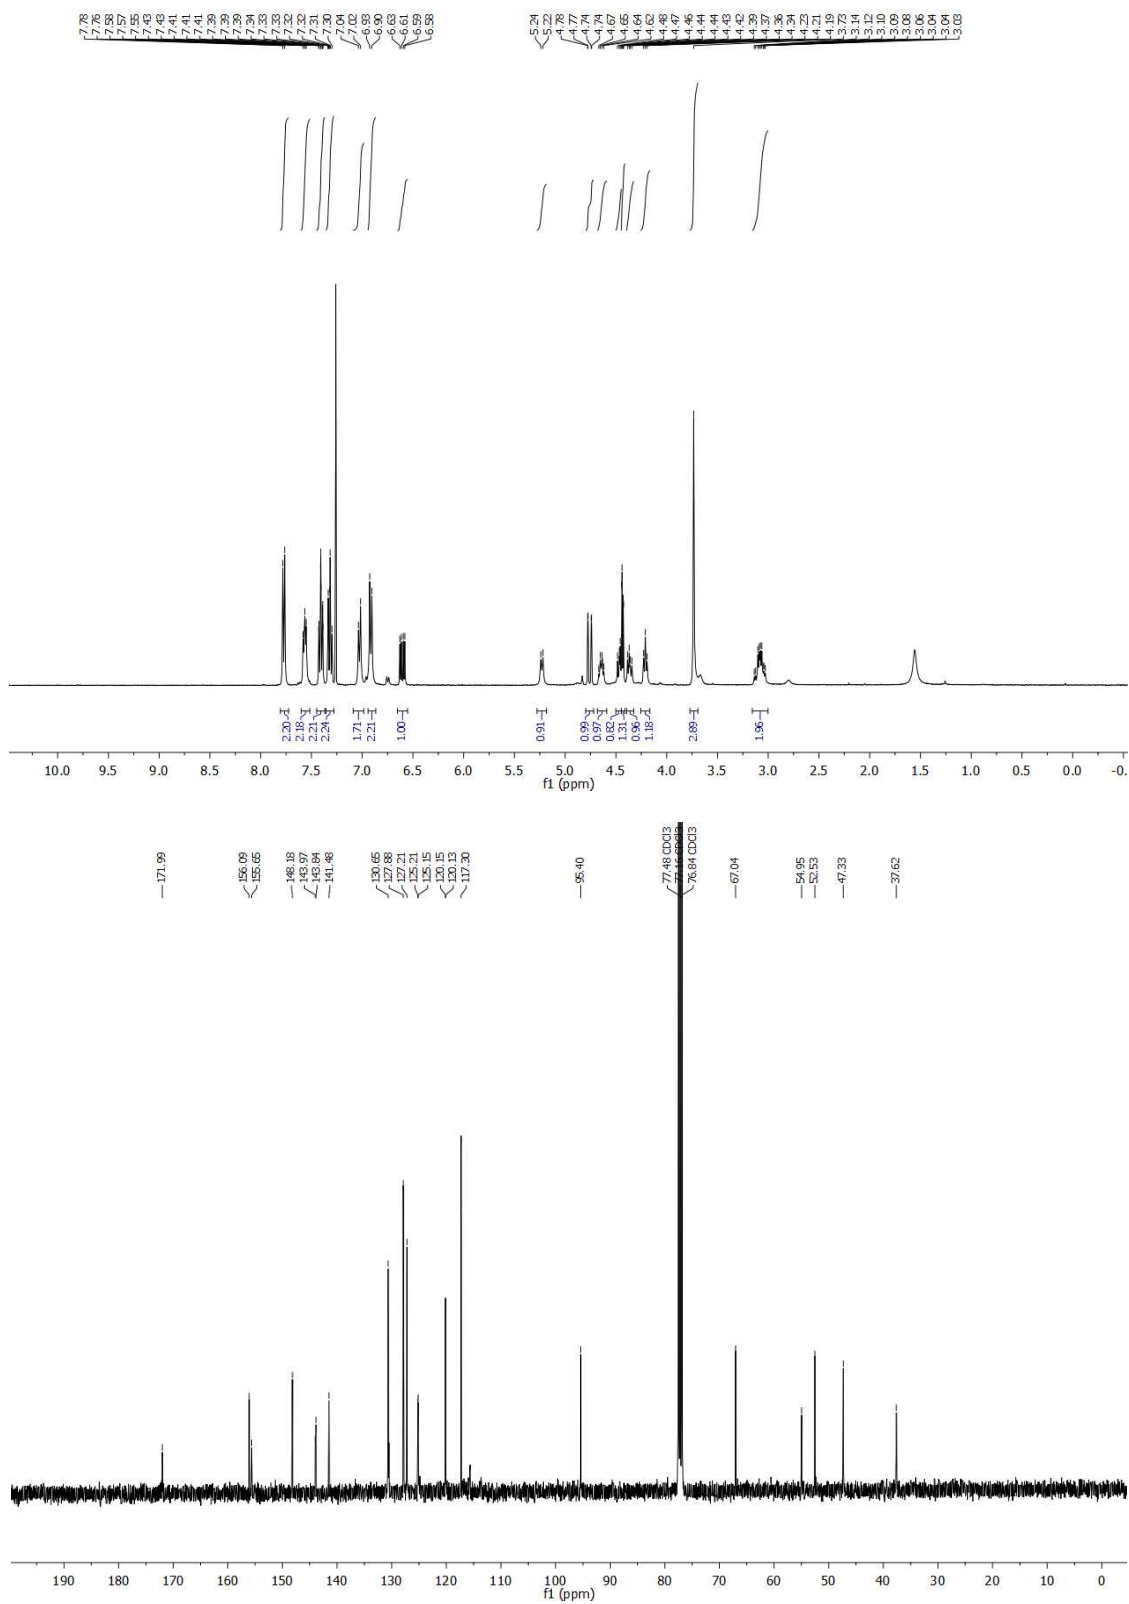

Figure S8. <sup>1</sup>H and <sup>13</sup>C NMR spectra of *N*-(9-fluorenylmethoxycarbonyl)-*p*-vinloxy-*L*-phenylalanine methyl ester.

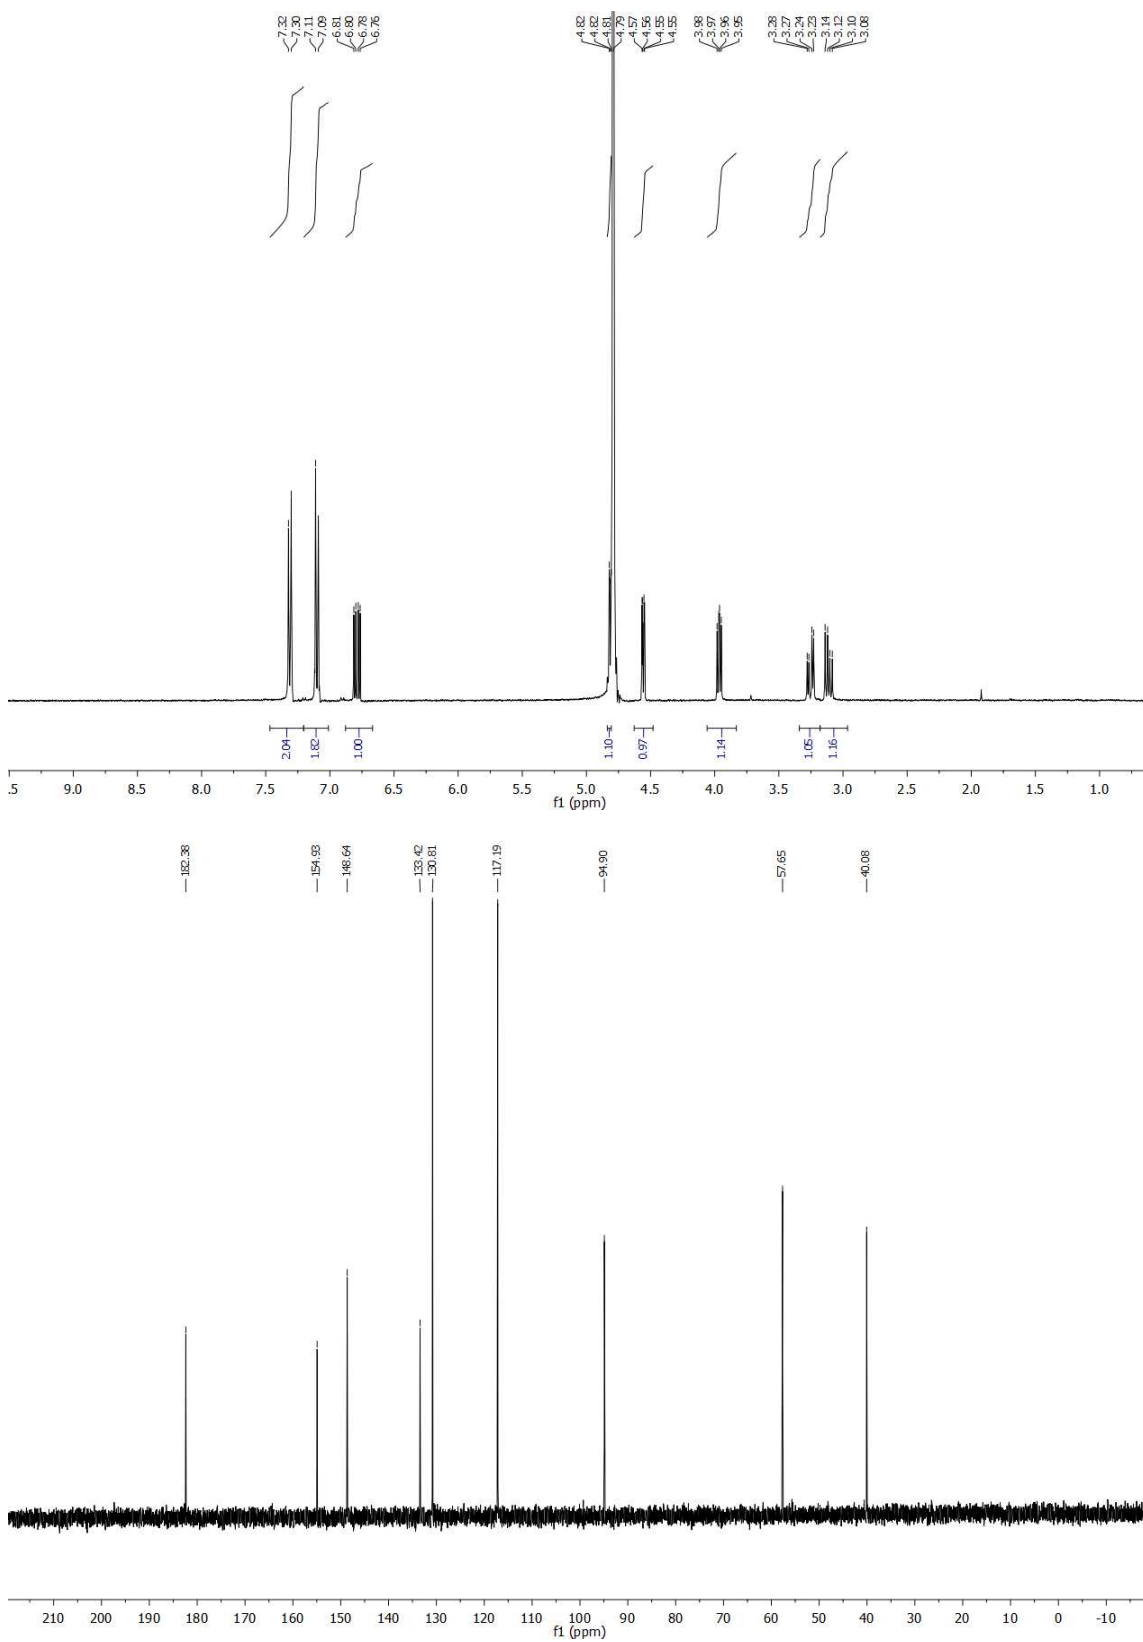

Figure S9.  $^1\text{H}$  and  $^{13}\text{C}$  NMR spectra of ViP.

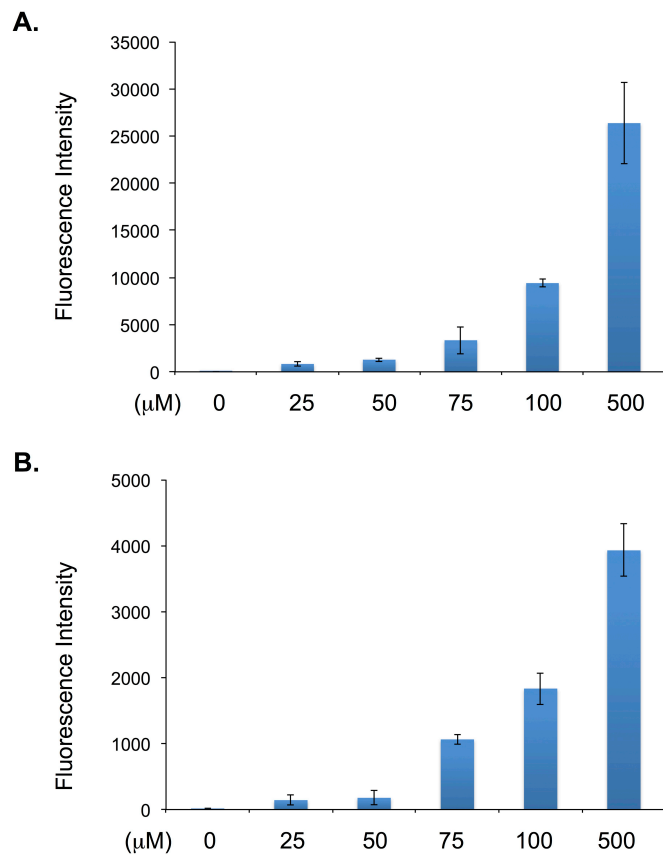

**Figure S10. Fluorescence intensity change of cells expressing sfGFP-Tyr66ViP or cpsfGFP-Tyr66ViP in the presence of different concentrations of  $\text{Hg}^{2+}$ .** (A) sfGFP-Tyr66ViP in the presence of different concentrations of  $\text{Hg}^{2+}$  for 1 h; (B) cpsfGFP-Tyr66ViP in the presence of different concentrations of  $\text{Hg}^{2+}$  for 1 h.

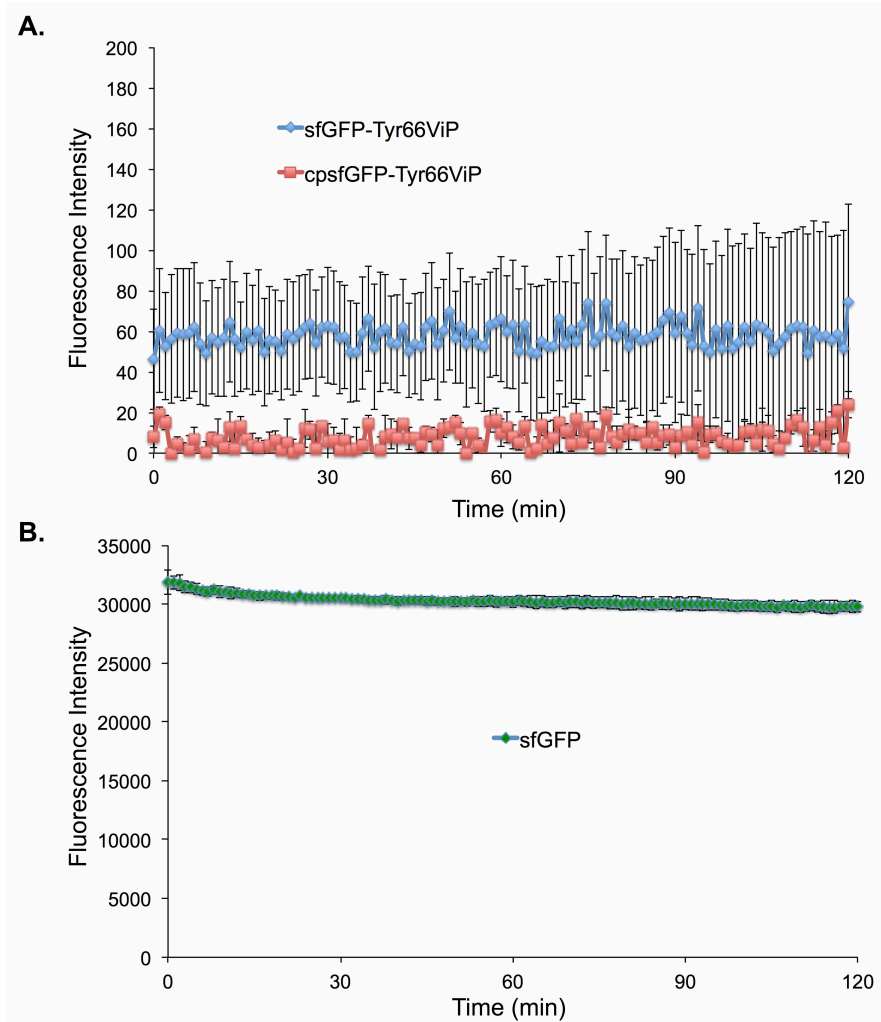

**Figure S11. Photostability of the probes.** (A) Protein samples (0.5  $\mu$ M), sfGFP-Tyr66ViP and cpsfGFP-Tyr66ViP, were irradiated at 485 nm and the fluorescence signals were detected at 513 nm; (B) As a comparison, the fluorescence intensity of sfGFP (0.5  $\mu$ M) was  $\sim$ 30,000.

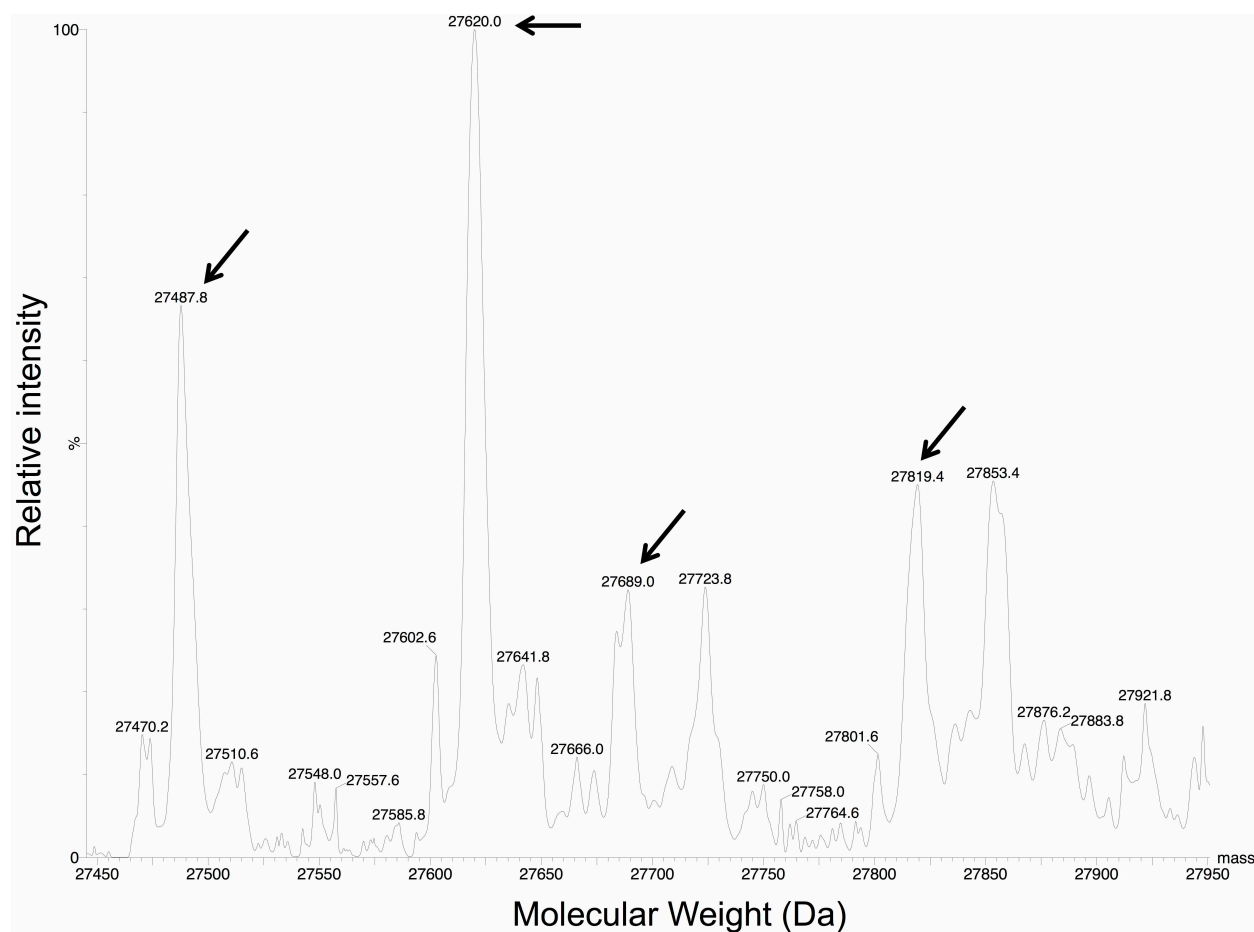

**Figure S12. Mass spectrometry analysis of the deprotection of sfGFP-Tyr66ViP with Hg<sup>2+</sup>.** This is deconvoluted ESI-MS spectra of the sfGFP-Tyr66ViP after the treatment with 100  $\mu$ M Hg<sup>2+</sup>. Expected masses: 27490.1 Da (M + Hg<sup>2+</sup>; without the N-terminal Met), 27621.2 Da (M + Hg<sup>2+</sup>; with the N-terminal Met), 27690.7 Da (M + 2Hg<sup>2+</sup>; without the N-terminal Met), and 27821.8 Da (M + 2Hg<sup>2+</sup>; with the N-terminal Met); observed masses: 27487.8 Da (M + Hg<sup>2+</sup>; without the N-terminal Met), 27620.0 Da (M + Hg<sup>2+</sup>; with the N-terminal Met), 27689.0 Da (M + 2Hg<sup>2+</sup>; without the N-terminal Met), and 27819.4 Da (M + 2Hg<sup>2+</sup>; with the N-terminal Met). There were no obvious signals corresponding to sfGFP-Tyr66ViP, which indicated a complete deprotection.



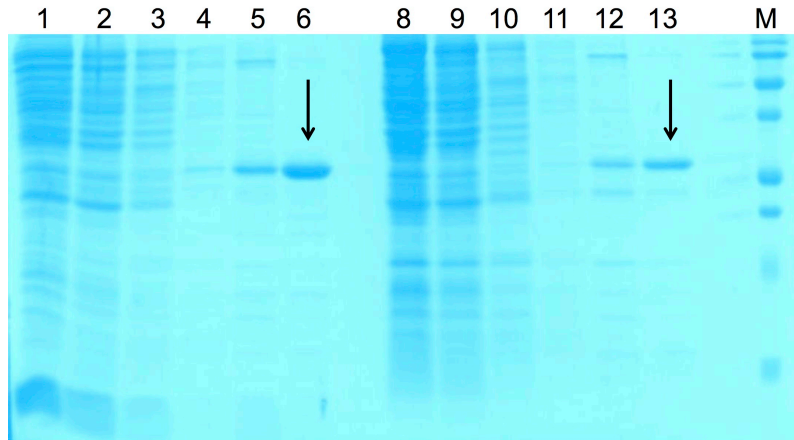

**Figure S13. SDS-PAGE analysis of purification of sfGFP-Tyr66ViP and cpsfGFP-Tyr66ViP.** Lane M, molecular weight marker; Lane 1-6, purification of sfGFP-Tyr66ViP; Lane 8-13, purification of cpsfGFP-Tyr66ViP; Lane 1 and 8, cell lysate; Lane 2 and 9, pass through fraction; Lane 3 and 10, first wash fraction; Lane 4 and 11, second wash fraction; Lane 5 and 12, first elution fraction; Lane 6 and 13, second elution fraction. The protein purity was estimated based on the second elution fractions (arrows). The second elution fractions were used for sensor characterizations.

Table S1. Calculation of quantum yield ( $\phi$ ).

|     | fluorescein | sfGFP-Tyr66ViP | cpsfGFP-Tyr66rViP |
|-----|-------------|----------------|-------------------|
| 490 | 23876.0345  | 2933.65469     | 1244.56582        |
| 491 | 26888.74748 | 3097.91937     | 1276.11121        |
| 492 | 31749.26281 | 3649.55827     | 1326.34144        |
| 493 | 37302.852   | 3876.83561     | 1047.60833        |
| 494 | 44787.72369 | 4456.22539     | 1028.04536        |
| 495 | 51590.8316  | 4313.70009     | 1234.71991        |
| 496 | 56535.83891 | 5191.12924     | 998.56232         |
| 497 | 64566.34103 | 5768.35184     | 1131.34141        |
| 498 | 73281.45709 | 6386.55865     | 998.54047         |
| 499 | 78796.85318 | 6597.74183     | 1308.32441        |
| 500 | 89231.64885 | 6837.80331     | 938.05193         |
| 501 | 95930.21524 | 8176.21529     | 1101.7519         |
| 502 | 104434.3492 | 8697.09269     | 1090.80788        |
| 503 | 110874.3546 | 8776.42456     | 1286.94997        |
| 504 | 118088.4859 | 9529.05907     | 1256.98665        |
| 505 | 124163.9683 | 9744.39411     | 1504.0615         |
| 506 | 130623.0561 | 9709.18455     | 1430.03295        |
| 507 | 134629.1726 | 10742.30971    | 1296.78039        |
| 508 | 138606.1214 | 10406.90279    | 1297.98378        |
| 509 | 139235.44   | 9803.90239     | 1433.24853        |
| 510 | 142214.8967 | 10667.46626    | 1318.2265         |
| 511 | 142965.6054 | 10616.91446    | 1390.14025        |
| 512 | 144605.4251 | 10226.29883    | 1493.1432         |
| 513 | 143223.9997 | 10376.02846    | 1370.37779        |
| 514 | 140021.2229 | 9434.25405     | 1235.28403        |
| 515 | 142867.1915 | 9344.87047     | 1450.58823        |
| 516 | 137812.4872 | 9116.23098     | 1234.73508        |
| 517 | 136424.1237 | 8214.99595     | 1256.93685        |
| 518 | 130950.4546 | 8136.59495     | 1494.24722        |
| 519 | 129094.113  | 7829.33432     | 1369.12609        |
| 520 | 124944.8702 | 7864.95935     | 1235.41749        |
| 521 | 121892.7607 | 7025.81436     | 1195.27061        |
| 522 | 118868.8343 | 7064.51443     | 1020.51377        |
| 523 | 113182.053  | 6225.21883     | 1040.04651        |
| 524 | 109169.9044 | 5407.01895     | 977.44974         |
| 525 | 103003.2126 | 6237.96309     | 1080.87654        |
| 526 | 100082.2676 | 5413.42326     | 1174.28694        |
| 527 | 96797.55017 | 5086.9111      | 1081.39363        |
| 528 | 90855.18232 | 5120.07667     | 895.2911          |
| 529 | 89006.36249 | 4731.59424     | 1225.11766        |
| 530 | 85129.23076 | 4714.04399     | 855.16733         |
| 531 | 79834.34204 | 4391.13978     | 1185.97031        |
| 532 | 77803.90893 | 4603.74125     | 957.93509         |

|     |             |            |            |
|-----|-------------|------------|------------|
| 533 | 73316.82299 | 4216.3082  | 875.09447  |
| 534 | 70501.25655 | 4569.23661 | 1060.67072 |
| 535 | 67499.13336 | 4087.90008 | 1030.24785 |
| 536 | 66014.32907 | 3794.71394 | 1030.00728 |
| 537 | 62832.59871 | 3774.27979 | 987.59581  |
| 538 | 60166.33976 | 3754.21055 | 1122.07758 |
| 539 | 57332.26315 | 3921.22198 | 844.79432  |
| 540 | 54595.12115 | 3566.87544 | 1134.17934 |
| 541 | 55556.76939 | 3515.69386 | 1183.76542 |
| 542 | 51004.0065  | 3680.74416 | 834.12616  |
| 543 | 50351.01486 | 3396.27497 | 1071.64684 |
| 544 | 49263.22683 | 3406.05941 | 834.99376  |
| 545 | 47166.37625 | 3342.29556 | 998.57616  |
| 546 | 47007.04313 | 3352.20957 | 905.2345   |
| 547 | 44702.32045 | 3087.81106 | 966.86718  |
| 548 | 43190.60873 | 3201.2512  | 1132.99422 |
| 549 | 42709.22703 | 3022.35866 | 917.05833  |
| 550 | 40909.30827 | 2918.55426 | 895.88198  |
| 551 | 38564.17088 | 2642.49988 | 885.50655  |
| 552 | 37838.61646 | 2726.82309 | 906.67333  |
| 553 | 36709.37395 | 2766.6228  | 855.58623  |
| 554 | 38212.5139  | 2281.44662 | 1009.15168 |
| 555 | 34263.22576 | 2426.97897 | 1049.65508 |
| 556 | 34278.38127 | 2172.16779 | 1049.96484 |
| 557 | 32226.09003 | 2377.83595 | 855.01539  |
| 558 | 31164.101   | 2106.59441 | 741.30089  |
| 559 | 30026.89314 | 1808.89724 | 864.50222  |
| 560 | 28791.82322 | 2190.94967 | 864.71445  |
| 561 | 27920.70652 | 1810.86304 | 896.44905  |
| 562 | 26669.26749 | 1788.96374 | 834.81218  |
| 563 | 25635.95963 | 2013.74064 | 813.4007   |
| 564 | 24445.26645 | 1810.12966 | 957.37591  |
| 565 | 24246.8882  | 1647.19308 | 823.81403  |
| 566 | 22356.4911  | 1605.90006 | 783.01853  |
| 567 | 22054.90308 | 1603.48117 | 834.21683  |
| 568 | 21758.92054 | 1634.48742 | 750.90518  |
| 569 | 20383.5004  | 1491.6986  | 751.35344  |
| 570 | 19041.75673 | 1656.86222 | 741.61485  |
| 571 | 18982.15518 | 1376.9052  | 824.42456  |
| 572 | 16929.62218 | 1491.00808 | 812.88703  |
| 573 | 17081.5156  | 1264.81252 | 751.78871  |
| 574 | 16496.13811 | 1533.83053 | 937.77498  |
| 575 | 15768.3831  | 1542.1756  | 752.38505  |
| 576 | 14690.0035  | 1418.81083 | 906.00555  |
| 577 | 14529.20345 | 1398.53149 | 740.8559   |
| 578 | 12937.7598  | 1389.84498 | 843.6332   |

|     |             |            |           |
|-----|-------------|------------|-----------|
| 579 | 12994.21223 | 1214.37053 | 813.6072  |
| 580 | 12342.11715 | 914.23094  | 793.02727 |
| 581 | 11227.06436 | 1243.43687 | 967.25969 |
| 582 | 10974.66784 | 997.92589  | 772.04486 |
| 583 | 10753.33063 | 1183.86462 | 948.00178 |
| 584 | 10202.79689 | 1038.7384  | 804.26153 |
| 585 | 9826.33928  | 1120.50955 | 937.19672 |
| 586 | 9123.3629   | 967.02595  | 710.28957 |
| 587 | 9107.48423  | 1224.85195 | 885.51812 |
| 588 | 8507.31947  | 1131.53611 | 742.04388 |
| 589 | 8678.52423  | 1057.79226 | 761.62481 |
| 590 | 7598.40068  | 1047.96996 | 833.61114 |
| 591 | 7354.65325  | 966.5488   | 627.76485 |
| 592 | 7331.21059  | 1069.7153  | 741.73871 |
| 593 | 7146.41591  | 945.43684  | 762.3683  |
| 594 | 6712.6969   | 1079.44967 | 895.55973 |
| 595 | 6785.77272  | 1007.75497 | 720.46612 |
| 596 | 6287.39208  | 1039.51928 | 916.87527 |
| 597 | 5876.82575  | 1120.81114 | 782.95922 |
| 598 | 6502.48336  | 1017.13401 | 885.2904  |
| 599 | 5903.19968  | 1058.53606 | 915.44662 |
| 600 | 5715.99751  | 771.58973  | 740.80728 |
| 601 | 5102.64737  | 998.22631  | 792.89978 |
| 602 | 5296.56276  | 986.26437  | 762.12629 |
| 603 | 5057.59882  | 843.03202  | 802.59282 |
| 604 | 4867.70897  | 1152.15544 | 689.70078 |
| 605 | 4977.34624  | 1132.37299 | 690.26764 |
| 606 | 4928.45412  | 1089.81244 | 875.88254 |
| 607 | 4574.19153  | 1068.87156 | 803.10336 |
| 608 | 4070.93272  | 863.52572  | 740.60677 |
| 609 | 3968.83032  | 854.0292   | 771.79036 |
| 610 | 3801.50833  | 730.12148  | 957.46945 |
| 611 | 3938.34926  | 965.47454  | 782.54896 |
| 612 | 3972.23745  | 945.53821  | 678.64432 |
| 613 | 3504.18351  | 843.80834  | 668.92969 |
| 614 | 3746.83412  | 844.23154  | 793.03694 |
| 615 | 3210.92091  | 822.93193  | 587.4474  |
| 616 | 3247.23231  | 832.81835  | 761.70958 |
| 617 | 3120.33478  | 668.36608  | 689.6379  |
| 618 | 3075.07526  | 915.60057  | 916.24773 |
| 619 | 3285.73076  | 832.9177   | 834.21855 |
| 620 | 2866.20026  | 934.66361  | 792.63451 |
| 621 | 2518.61522  | 822.10658  | 709.69188 |
| 622 | 2947.04822  | 925.69     | 781.88324 |
| 623 | 2304.70143  | 833.5922   | 772.38122 |
| 624 | 2379.46643  | 894.42727  | 813.80694 |

|     |            |            |           |
|-----|------------|------------|-----------|
| 625 | 2540.09524 | 853.43819  | 906.05028 |
| 626 | 2464.59916 | 823.15865  | 1049.6619 |
| 627 | 2390.03904 | 915.77788  | 679.81158 |
| 628 | 2084.72508 | 904.76825  | 710.95356 |
| 629 | 2002.26626 | 780.65321  | 669.38996 |
| 630 | 2075.82636 | 760.5977   | 946.54222 |
| 631 | 2010.63121 | 709.6487   | 792.04798 |
| 632 | 1620.8102  | 1039.12025 | 772.1581  |
| 633 | 1948.42139 | 791.23018  | 854.43799 |
| 634 | 2002.38514 | 822.61926  | 966.99915 |
| 635 | 1801.34706 | 1038.97199 | 853.89806 |
| 636 | 1925.91127 | 802.72189  | 710.41774 |
| 637 | 1580.35592 | 688.61903  | 762.49364 |
| 638 | 1602.70756 | 739.58972  | 782.74825 |
| 639 | 1582.16459 | 852.56604  | 761.37899 |
| 640 | 1578.92357 | 853.47037  | 874.93859 |
| 641 | 1726.64705 | 699.31407  | 751.63824 |
| 642 | 1485.30341 | 934.85608  | 823.51586 |
| 643 | 1443.52469 | 894.28869  | 853.18792 |
| 644 | 1431.1452  | 750.91533  | 884.53934 |
| 645 | 1684.66912 | 751.22595  | 679.64317 |
| 646 | 1221.46199 | 914.6466   | 762.51719 |
| 647 | 1571.06315 | 873.37727  | 771.96637 |
| 648 | 1380.60009 | 750.15423  | 700.02185 |
| 649 | 1537.44712 | 709.67958  | 700.25888 |
| 650 | 1316.65999 | 698.76582  | 710.6545  |
| 651 | 1138.51833 | 904.42225  | 772.13898 |
| 652 | 1148.90155 | 791.54925  | 781.50736 |
| 653 | 1115.4965  | 802.72216  | 750.98424 |
| 654 | 1105.09793 | 802.65169  | 792.69627 |
| 655 | 1053.2068  | 750.64146  | 720.95283 |
| 656 | 1390.98784 | 822.46721  | 771.53445 |
| 657 | 1147.40547 | 740.58465  | 864.47406 |
| 658 | 1105.42399 | 884.79227  | 576.58961 |
| 659 | 1000.50422 | 760.49617  | 680.00218 |
| 660 | 1170.51749 | 678.04325  | 823.26458 |
| 661 | 1127.62465 | 781.2397   | 637.86027 |
| 662 | 1010.52956 | 843.51689  | 658.40389 |
| 663 | 1189.24966 | 792.10484  | 792.8315  |
| 664 | 1158.74622 | 894.35077  | 813.26298 |
| 665 | 863.99762  | 915.12661  | 699.41226 |
| 666 | 978.68222  | 751.09043  | 895.19956 |
| 667 | 820.57629  | 740.8531   | 854.68495 |
| 668 | 842.53051  | 729.50919  | 711.07251 |
| 669 | 885.71542  | 842.53495  | 740.91624 |
| 670 | 1106.56006 | 729.78702  | 669.02179 |

|        |            |             |             |
|--------|------------|-------------|-------------|
| 671    | 958.2119   | 843.56049   | 751.45146   |
| 672    | 768.63173  | 781.76608   | 741.5288    |
| 673    | 958.83678  | 740.21729   | 658.40757   |
| 674    | 1116.74358 | 771.20253   | 761.01316   |
| 675    | 957.46749  | 905.76347   | 719.82886   |
| 676    | 1146.89222 | 689.64058   | 885.5548    |
| 677    | 800.31989  | 719.39101   | 761.9379    |
| 678    | 853.62003  | 729.62153   | 792.39007   |
| 679    | 863.12197  | 812.50493   | 648.38697   |
| 680    | 884.19531  | 833.40558   | 710.69721   |
| 681    | 1063.61823 | 760.44355   | 772.46007   |
| 682    | 1001.48329 | 883.7965    | 967.09957   |
| 683    | 1074.66063 | 822.52631   | 791.84313   |
| 684    | 999.41445  | 833.84469   | 997.77851   |
| 685    | 831.56758  | 803.02049   | 895.78612   |
| 686    | 695.45137  | 657.94297   | 761.42282   |
| 687    | 927.31477  | 750.73872   | 812.58001   |
| 688    | 757.49578  | 771.57755   | 678.91271   |
| 689    | 999.8856   | 956.88232   | 865.15284   |
| 690    | 905.83294  | 688.27161   | 896.01833   |
| 691    | 695.75207  | 883.79953   | 813.3511    |
| 692    | 715.98822  | 750.89175   | 812.76476   |
| 693    | 957.90238  | 885.3778    | 679.10418   |
| 694    | 926.2972   | 864.38645   | 792.68851   |
| 695    | 779.45805  | 843.23173   | 658.57744   |
| 696    | 1032.27855 | 915.20557   | 771.37617   |
| 697    | 873.06116  | 740.81807   | 534.88519   |
| 698    | 894.46902  | 966.90002   | 844.48456   |
| 699    | 821.40385  | 862.96483   | 793.18876   |
| 700    | 853.6715   | 883.86358   | 679.24722   |
| Area   | 6387788.86 | 489505.9283 | 150591.8494 |
| Abs    | 0.051      | 0.05        | 0.047       |
| $\phi$ | 0.925      | 0.072301833 | 0.023662736 |

## IV References

- (1) Rudolf, J. D.; Poulter, C. D. Tyrosine O-Prenyltransferase SirD Catalyzes S-, C-, and N-Prenylations on Tyrosine and Tryptophan Derivatives. *ACS Chem. Biol.* **2013**, *8*, 2707-2714.
